# Supplementary material for: A molecularly imprinted polymer with flash column chromatography for the selective and continuous extraction of diphenyl amine
Source: Royal Society of Chemistry journal article supplement (doi:10.1039/c5ra11965k), 2015-01-01
Supplement: c5ra11965k1.pdf [file c5ra11965k1.pdf]

### Supporting material

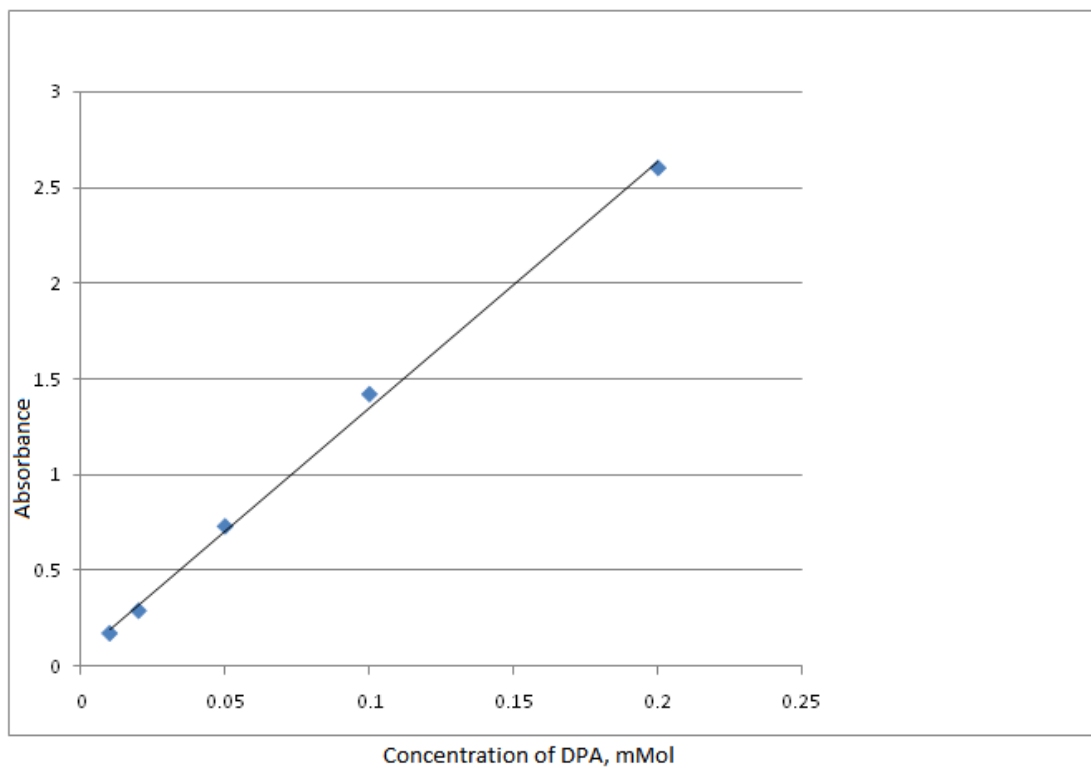

**Fig. 1S** Calibration of DPA using UV visible spectrophotometry at 280 nm

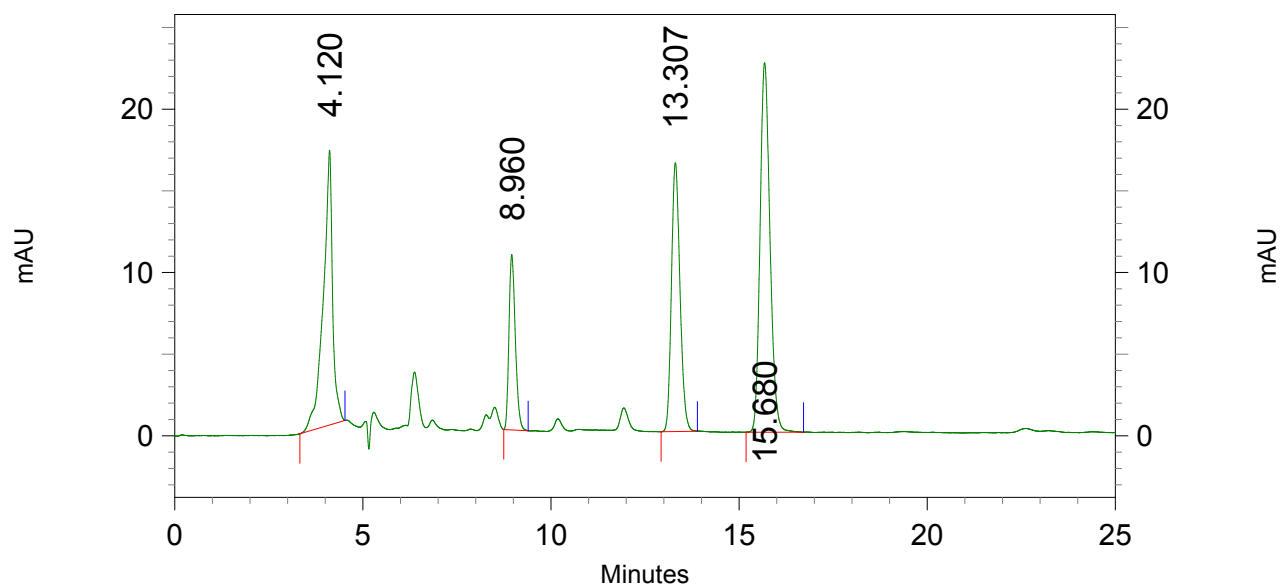

**Fig. 2S.** HPLC Chromatogram of mixture containing Tetryl (4.1), TNT (8.9), DPA (13.3), NDPA (15.6) in optimum mobile phase (80:20, acetonitrile:water) with  $0.4 \text{ ml min}^{-1}$  flow rate at 225 nm

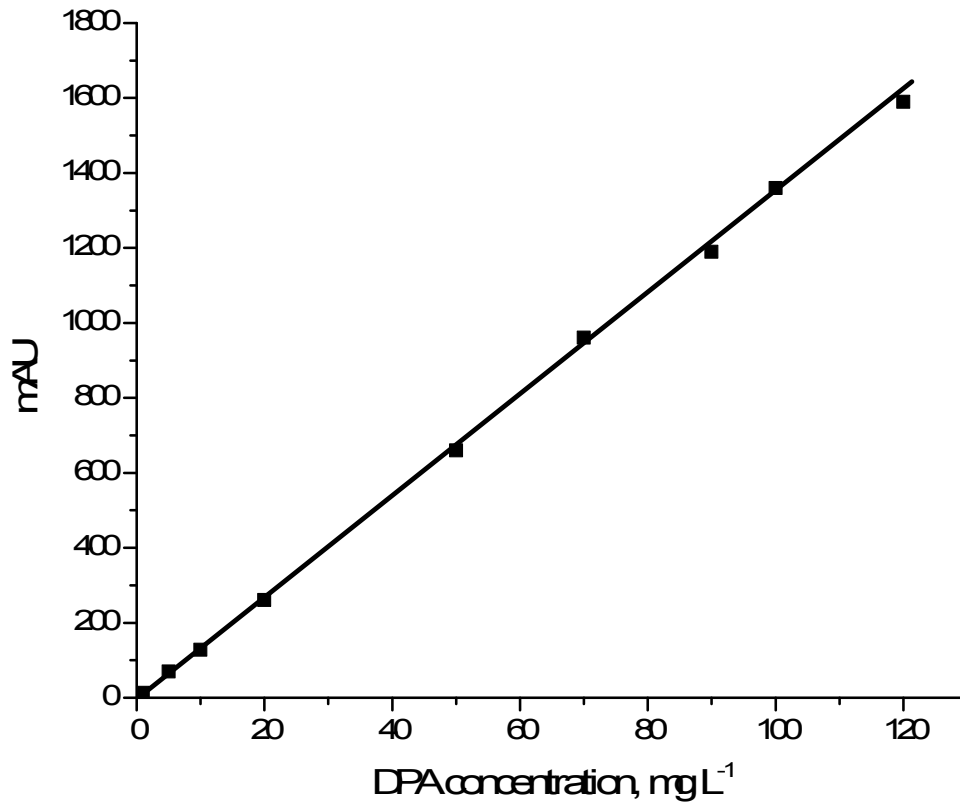

**Fig. 3S.** Calibration of DPA using HPLC in optimum mobile phase (80:20, acetonitrile:water) with 0.4 ml min<sup>-1</sup> flow rate and retention time of 13.3 min at 280 nm
